# Supplementary material for: Prevalence, multiple antibiotic resistance and virulence profile of methicillin-resistant Staphylococcus aureus (MRSA) in retail poultry meat from Edo, Nigeria
Source: Front Cell Infect Microbiol. 2023 Mar 2;13:1122059. doi: 10.3389/fcimb.2023.1122059 (PMC10017849; doi:10.3389/fcimb.2023.1122059)
Supplement: Supplementary file 1 [file DataSheet_1.docx]

Supplementary Material

Prevalence, Multiple Antibiotic Resistance and Virulence Profile of Methicillin-Resistant *Staphylococcus aureus* (MRSA) in Retail Poultry Meat from Edo, Nigeria

**Etinosa O. Igbinosa1,2*, Abeni Beshiru1,2,3, Isoken H. Igbinosa1,4,Abraham G. Ogofure1, Temitope C. Ekundayo5,6, Anthony I. Okoh5,7**

1Applied Microbial Processes & Environmental Health Research Group, Faculty of Life Sciences, University of Benin, Benin City Nigeria

2Stellenosch Institute for Advanced Study (STIAS), Wallenberg Research Centre at Stellenbosch University, Stellenbosch 7600, South Africa

3Department of Microbiology, College of Natural and Applied Sciences, Western Delta University, Oghara, Nigeria

4Department of Environmental Management and Toxicology, Faculty of Life Sciences, University of Benin, Benin City, Nigeria

5SAMRC Microbial Water Quality Monitoring Centre, University of Fort Hare, Alice 5700, Eastern Cape Province, South Africa

6Department of Microbiology, University of Medical Sciences, Ondo City, Ondo State, Nigeria

7Department of Environmental Health Sciences, College of Health Sciences, University of Sharjah, Sharjah, United Arab Emirates

*** Correspondence:**Etinosa O. Igbinosa
Etinosa.Igbinosa@uniben.edu

**Supplementary Table 1**. Primers used in this study

|  | **Target genes** | **Primer sequences (5' →3')** | **Size (bp)** | **References** |
| --- | --- | --- | --- | --- |
| *Staphylococcus aureus* | *nuc* | F:GCGATTGATGGTGATACGGTT  R:AGCCAAGCCTTGACGAACTA AAGC | 270 | Brakstad *et al*. (1992) |
| Coagulase | *coa* | F:CGAGACCAAGATTCAACAAG  R:AAAGAAAACCACTCACATCA | 730 | Aslantas *et al*. (2007) |
| Staphylococci protein A | *spa* | F:CAAGCACCAAAAGAGGAA  R:CACCAGGTTTAACGACAT | 320 | Frenay *et al*. (1996) |
| Panton valentine leucocidin | *Pvl* | F:ATCATTAGGTAAAATGTCTGGACATGATCCA R:GCATCAAGTGTATTGGATAGCAAAAGC | 433 | McClure *et al*. (2006) |
| Haemolysins | *Hla* | F:CTGATTACTATCCAAGAAATTCGATTG  R:CTTTCCAGCCTACTTTTTTATCAGT | 209 | Jarraud *et al*. (2002) |
|  | *Hlb* | F:GTGCACTTACTGACAATAGTGC  R:GTTGATGAGTAGCTACCTTCAGT | 309 | Jarraud *et al*. (2002) |
| Enterotoxins | *sea* | F:GCAGGGAACAGCTTTAGGC  R:GTTCTGTAGAAGTATGAAACACG | 521 | Monday *et al*. (1999) |
|  | *see* | F:TACCAATTAACTTGTGGATAGAC  R:CTCTTTGCACCTTACCGCA | 171 | Monday *et al*. (1999) |
|  | *Seb* | F:GGACACTAAGTTAGGGAATTATGA  R:GCTCAGTTACACCACCATAC | 200 | Mohammed *et al*., 2016 |
|  | *Sed* | F:GTGGTGAAATAGATAGGACTGC  R:ATATGAAGGTGCTCTGTGG | 385 | Pereira *et al*. (2009) |
|  | *Sec* | F:GGTATGATATGATGCCTGCAC  R:GGTGGACTTCTATCTTCACACT | 111 | Mohammed *et al*. (2016) |
|  | *seg* | F:TGTATGGTGGTGTAACTGAGCA  R:TGGTGCAGGCATCATGTCATA | 272 | Mohammed *et al*. (2016) |
|  | *seh* | F:CAACTGCTGATTTAGCTCAG  R:GTCGAATGAGTAATCTCTAGG | 359 | Pereira *et al*. (2009) |
|  | *sej* | F:CATCAGAACTGTTGTTCCGCTAG  R:CTGAATTTTACCATCAAAGGTAC | 192 | Jung *et al*. (2015) |
|  | *sei* | F:CTCAAGGTGATATTGGTGTAGG  R:AAAAAACTTACAGGCAGTCCATCTC | 577 | Jung *et al*. (2015) |
|  | *sek* | F:TAGGTGTCTCTAATAATGCCA  R:TAGATATTCGTTAGTAGCTG | 293 | Omoe *et al*. (2005) |
|  | *Sem* | F:ATGCTGTAGATGTATATGGTCTAAG  R:CGTCCTTATAAGATATTTCTACATC | 473 | Fueyo *et al*. (2005) |
|  | *sel* | F:AATATATAACTAGTGATCTAAAGGG  R:TATGGAATACTACACACCCCTTATA | 359 | Fueyo, *et al*. (2005) |
|  | *Sen* | F:ATGAGATTGTTCTACATAGCTGCAAT  R:AACTCTGCTCCCACTGAAC | 680 | Jarraud *et al*. (2002) |
|  | *seo* | F:TGTAGTGTAAACAATGCATATGCAAATG  R:TTATGTAAATAAATAAACATCAATATGATGTC | 722 | Fueyo *et al*. (2005) |
|  | *ser* | F:AAACCAGATCCAAGGCCTGGAG  R:TCACATTTGTAGTCAGGTGAACTT | 700 | Fueyo *et al*. (2005) |
|  | *seq* | F:AAGAGGTAACTGCTCAAG  R:TTATTCAGTCTTCTCATATG | 285 | Yarwood *et al*. (2002) |
|  | *sep* | F:TTAGACAAACCTATTATCATAATGG  R:TATTATCATGTAACGTTACACCGCC | 272 | Fueyo *et al*. (2005) |
|  | *Seu* | F:TAAAATAAATGGCTCTAAAATTGATGG  R:ATCCGCTGAAAAATAGCATTGAT | 141 | Letertre *et al*. (2003) |
| Toxic shock syndrome toxin 1 | *tsst*-1 | F:GCTTGCGACAACTGCTACAG  R:TGGATCCGTCATTCATTGTTAT | 559 | Monday *et al*. (1999) |
| Exfoliative toxin B precursor | *Etb* | F:ACAAGCAAAAGAATACAGCG  R:GTTTTTGGCTGCTTCTCTTG | 226 | Jackson *et al*. (1986) |
| Exfoliative toxin A precursor | *Eta* | F:GCAGGTGTTGATTTAGCATT  R:AGATGTCCCTATTTTTGCTG | 93 | Lee *et al*. (1987) |
| Intercellular adhesion protein D | *ica*D | F:ATGGTCAAGCCCAGACAGAG  R:CGTGTTTTCAACATTTAATGCAA | 198 | Arciola *et al*. (2001) |
| Intercellular adhesion protein C | *ica*C | F:TAACTTTAGGCGCATATGTTTT  R:TTCCAGTTAGGCTGGTATTG | 400 | Arciola *et al*. (2005) |
| Intercellular adhesion protein B | *ica*B | F:CTGATCAAGAATTTAAATCACAAA  R:AAAGTCCCATAAGCCTGTTT | 302 | Arciola *et al*. (2005) |
| Intercellular adhesion protein A | *ica*A | F:ACAGTCGCTACGAAAAGAAA  R:GGAAATGCCATAATGACAAC | 103 | Arciola *et al*. (2005) |
| Methicillin resistance | *mec*A | F:AAAATCGATGGTAAAGGTTGGC  R:AGTTCTGCAGTACCGGATTTGC | 532 | Strommenger *et al*. (2003) |
| Beta-lactamase | *Bla*Z | F:ACTTCAACACCTGCTGCTTTC  R:TAGGTTCAGATTGGCCCTTAG | 240 | Martineau *et al*. (2000) |
| Tetracyclines | *tet*K | F:TTAGGTGAAGGGTTAGGTCC  R:GCAAACTCATTCCAGAAGCA | 718 | Aarestrup *et al*. (2000) |
|  | *tet*L | F:TCGTTAGCGTGCTGTCATTC  R:GTATCCCACCAATGTAGCCG | 267 | Ng *et al*. (2001) |
|  | *tet*M | F:GTGGACAAAGGTACAACGAG  R:CGGTAAAGT TCG TCACACAC | 406 | Ng *et al*. (2001) |
|  | *tet*O | F:AACTTAGGCATTCTGGCTCAC  R:TCCCACTGT TCCATATCGTCA | 515 | Ng *et al*. (2001) |
| Erythromycins | *erm*A | F:TATCTTATCGTTGAGAAGGGATT  R:CTACACTTGGCTTAGGATGAAA | 139 | Martineau *et al*. (2000) |
|  | *erm*B | F:CTATCTGATTGTTGAAGAAGGATT  R:GTTTACTCTTGGTTTAGGATGAAA | 142 | Martineau *et al*. (2000) |
|  | *erm*C | F:CTTGTTGATCACGATAATTTCC  R:ATCTTTTAGCAAACCCGTATTC | 190 | Martineau *et al*. (2000) |
| Aminoglycosides | *aac(6´)-Ie-aph(2´´)-Ia* | F:CCAAGAGCAATAAGGGCATACC  R:CACACTATCATAACCATCACCG | 347 | Schmitz *et al*. (1999) |
|  | *ant(4´)-Ia* | F:CTGCTAAATCGGTAGAAGC  R:CAGACCAATCAACATGGCACC | 172 | Schmitz *et al*. (1999) |
|  | *aph(3´)-IIIa* | F:CTGATCGAAAAATACCGCTGC  R:TCATACTCTTCCGAGCAAAGG | 268 | Schmitz *et al*. (1999) |
| Chloramphenicol | *cat::p*C194 | F:CAATCCAAGGAATCATTGAAATCGG  R:AAAGCCAGTCATTAGGCCTATCTG | 472 | Argudín *et al*. (2011) |
|  | *cat::p*C221 | F:TGGAAGTTGTAAATAAAAATAAAGTG  R:CAATCCAAGGAATCATTGAAATCGG | 269 | Argudín *et al*. (2011) |
|  | *cat::p*C223 | F:AGGATATGAACTGTATCCTGCTTTG  R:AATAATGAAACATGGTAACCATCAC | 464 | Argudín *et al*. (2011) |
| Trimethoprim | *dfr*D | F:CCCTGCTATTAAAGCACC  R:CATGACCAGATAACTC | 606 | Dale *et al*. (1995) |
|  | *dfr*K | F:CAAGAGATAAGGGGTTCAGC  R:ACAGATACTTCGTTCCACTC | 229 | Argudín *et al*. (2011) |
|  | *dfr*G | F:TGCTGCGATGGATAAGAA  R:TGGGCAAATACCTCATTCC | 405 | Argudín *et al*. (2011) |
| **SCCmec** |  |  |  |  |
| Type I | *ORF E008* | F:GCTTTAAAGAGTGTCGTTACAGG  R:GTTCTCTCATAGTATGACGTCC | 613 | Zhang *et al*. (2005) |
| Type II | *kdpE* | F:GATTACTTCAGAACCAGGTCAT  R:TAAACTGTGTCACACGATCCAT | 287 | Kondo *et al*. (2007) |
| Type III | *J1 III* | F:CATTTGTGAAACACAGTACG  R:GTTATTGAGACTCCTAAAGC | 243 | Milheirico *et al*. (2007) |
| Type IVa | *ORF CQ002* | F:GCCTTATTCGAAGAAACCG  R:CTACTCTTCTGAAAAGCGTCG | 776 | Zhang *et al*. (2005) |
| Type IVb | *J1* Ivb | F:AGTACATTTTATCTTTGCGTA  R:AGTCATCTTCAATATGGAGAAAGTA | 1000 | Okuma *et al*. (2002) |
| Type IVc | *Ivc* | F:TCTATTCAATCGTTCTCGTATT  R:TCGTTGTCATTTAATTCTGAACT | 677 | Ma *et al*. (2005) |
| Type IVd | *CD002* | F:AATTCACCCGTACCTGAGAA  R:AGAATGTGGTTATAAGATAGCTA | 1242 | Kondo *et al*. (2007) |
| Type IVh | *J1* | F:TTCCTCGTTTTTTCTGAACG  R:CAAACACTGATATTGTGTCG | 663 | Milheirico *et al*. (2007) |
| Type V | *ORF V011* | F:GAACATTGTTACTTAAATGAGCG  R:TGAAAGTTGTACCCTTGACACC | 325 | Zhang *et al*. (2005) |

**Supplementary Table 2**: Antibiotic susceptibility profile of the isolates

|  |  | ***Staphylococcus aureus* (*n*=110)** | | |
| --- | --- | --- | --- | --- |
| **Antimicrobial class** | **Antibiotics** | **Resistance** | **Intermediate** | **Sensitive** |
| Penicillins | Penicillin G | 110(100) | NA | 0(0) |
| Glycopeptides | Vancomycin | 0(0) | 13(11.8) | 97(88.2) |
| Cephems | Ceftaroline | 43(39.1) | 13(11.8) | 54(49.1) |
| Lipopeptides | Daptomycin | 0(0) | 0(0) | 110(100) |
| Aminoglycosides | Gentamicin | 37(33.6) | 22(20) | 51(46.4) |
|  | Amikacin | 28(25.5) | 18(16.4) | 64(58.2) |
|  | Kanamycin | 33(30) | 21(19.1) | 56(50.9) |
| Macrolides | Azithromycin | 44(40) | 18(16.4) | 48(43.6) |
|  | Clarithromycin | 53(48.2) | 29(26.4) | 28(25.5) |
|  | Erythromycin | 49(44.6) | 26(23.6) | 35(31.8) |
| Lipoglycopeptides | Oritavancin | 0(0) | 0(0) | 110(100) |
|  | Teicoplanin | 0(0) | 0(0) | 110(100) |
| Tetracyclines | Doxycycline | 58(52.7) | 22(20) | 30(27.3) |
|  | Minocycline | 53(48.2) | 36(32.7) | 21(19.1) |
|  | Tetracycline | 64(58.2) | 32(29.1) | 14(12.7) |
| Fluoroquinolones | Ciprofloxacin | 71(64.6) | 16(14.6) | 23(20.1) |
|  | Levofloxacin | 84(76.4) | 12(10.9) | 14(12.7) |
|  | Moxifloxacin | 88(80) | 10(9.1) | 12(10.9) |
| Nitrofurantoins | Nitrofurantoin | 7(6.4) | 3(2.7) | 100(90.9) |
| Lincosamides | Clindamycin | 62(56.4) | 19(17.3) | 29(26.4) |
| Folate pathway inhibitors | Trimethoprim-  sulfamethoxazole | 39(35.5) | 13(11.8) | 58(52.7) |
|  | Sulfonamides | 53(48.2) | 13(11.8) | 44(40) |
|  | Trimethoprim | 71(64.6) | 20(18.2) | 19(17.3) |
| Phenicols | Chloramphenicol | 21(19.1) | 11(10) | 78(70.9) |
| Oxazolidinones | Linezolid | 15(13.6) | 12(10.9) | 83(75.5) |
|  | Tedizolid | 0(0) | 21(19.1) | 89(80.9) |
| Ansamycins | Rifampin | 103(93.6) | 7(6.4) | 0(0) |

**References**

Aarestrup, F.M., Agersu, Y., Ahrens, P., Jurgensen, J.C., Madsen, M., Jensen, L.B. (2000). Antimicrobial susceptibility and presence of resistance genes in staphylococci from poultry. Vet. Microbiol. 74: 353-364.

Arciola, C.R., Gamberini, S., Campoccia, D., Visai, L., Speziale, P., Baldassarri, L. (2005). A multiplex PCR method for the detection of all five individual genes of *ica* locus in *Staphylococcus epidermidis*. A survey on 400 clinical isolates from prosthesis-associated infections. J. Biomed. Mater. Res. A 75:408–413

Argudín, M.A., Tenhagen, B.A., Fetsch, A., Sachsenröder, J., Käsbohrer, A., Schroeter, A., *et al*. (2011). Virulence and resistance determinants of German *Staphylococcus aureus* ST398 isolates from nonhuman sources. Appl. Environ. Microbiol. 77:3052-3060.

Aslantas, O., Demir, C., Turutoglu, H., Cantekin, Z., Ergun, Y., Dogruer, G. (2007). Coagulase gene polymorphism of *Staphylococcus aureus* isolated from subclinical mastitis. Turkey J. Vet. Animal Sci. 31:253-257.

Brakstad, O.G., Aasbakk, K., Maeland, J.A. (1992). Detection of *Staphylococcus aureus* by polymerase chain reaction amplification of the nuc gene. J. Clin. Microbiol. 30:1654-1660.

Dale, G.E., Langen, H., Page, M.G., Then, R.L., Stüber, D. (1995). Cloning and characterization of a novel, plasmid-encoded trimethoprim-resistant dihydrofolate reductase from *Staphylococcus haemolyticus* MUR313. Antimicrob. Agents Chemother. 39:1920–1924.

Frenay, H.M., Bunschote, A.E., Schouls, L.M., van Leeuwen, W.J., Vandenbroucke-Grauls, C.M., Verhoef, J. *et al*. (1996). Molecular typing of methicillin-resistant *Staphylococcus aureus* on the basis of protein A gene polymorphism. European J. Clin. Microbiol. Infect. Dis. 15: 60-64.

Fueyo, J.M., Mendoza, M.C., Martin, M.C. (2005). Enterotoxins and toxic shock syndrome toxin in *Staphylococcus aureus* recovered from human nasal carriers and manually handled foods: Epidemiological and genetic findings. Microbes Infect. 7: 187-194.

Jackson, M.P., landolo, J.J. (1986). Sequence of the exfoliative toxin B gene of *Staphylococcus aureus*. J. Bacteriol. 167:726-728.

Jarraud, S., Mougel, C., Thioulouse, J., Lina, G., Meugnier, H., Forey, F., *et al*. (2002). Relationships between *Staphylococcus aureus* genetic background, virulence factors, *agr* groups (alleles), and human disease. Infect. Immun. 70:631–641.

Jung, S.B., Lee, Y.J., Lee, N., Kim, H.W., Oh, M., Paik, H. (2015). Virulence factors of *Staphylococcus aureus* isolated from Korean pork bulgogi: Enterotoxin production and antimicrobial resistance. Korean J. Food Sci. An. 35(4): 502-506.

Kondo, Y., Ito, T., Ma, X.X., Watanabe, S., Kreiswirth, B.N., Etienne, J., *et al*. (2007). Combination of multiplex PCRs for staphylococcal cassette chromosome *mec* type assignment: rapid identification system for *mec*, *ccr*, and major differences in junkyard regions. Antimicrob. Agents Chemother. 51: 264–274.

Lee, C.Y. Schmidt, J.J., Johnson-Winegar, A.D., Spero, L., Iandolo J.J. (1987). Sequence determination and comparison of the exfoliative toxin A and toxin B genes from *Staphylococcus aureus* J. Bacteriol. 169: 3904-3909.

Letertre, C., Perelle, S., Dilasser, F., Fach, P. (2003). Identification of a new putative enterotoxin SEU encoded by the *egc* cluster of *Staphylococcus aureus*. J. Appl. Microbiol. 95: 38-43.

Ma, X.X., Galiana, A., Pedreira, W., Mowszowicz, M., Christophersen, I., Machiavello, S., *et al*. (2005). Community-acquired methicillin-resistant *Staphylococcus aureus*, Uruguay. Emerg. Infect. Dis. 11: 973–976.

Martineau, F., Picard, F.J., Lansac, N., Menard, C., Roy, P.H., Ouellette, M., Bergeron, M.G. (2000). Correlation between the resistance genotype determined by multiplex PCR assays and the antibiotic susceptibility patterns of *Staphylococcus aureus* and *Staphylococcus epidermidis*. Antimicrob Agents Chemother. 44:231–238.

McClure, J.A., Conly, J.M., Lau, V., Elsayed, S., Louie, T., Hutchins, W., *et al*. (2006). Novel multiplex PCR assay for detection of the staphylococcal virulence marker panton-valentine leukocidin genes and simultaneous discrimination of methicillin-susceptible from -resistant staphylococci. J. Clin. Microbiol. 44:1141-1144.

Milheirico, C., Oliveira, D.C., de Lencastre, H. (2007b). Update to the multiplex PCR strategy for assignment of *mec* element types in *Staphylococcus aureus*. Antimicrob Agents Chemother. 51: 3374–3377.

Mohammed, E.Y., Abdel-Rhman, S.H., Barwa, R., El-Sokkary, M.A. (2016). Studies on enterotoxins and antimicrobial resistance in *Staphylococcus aureus* isolated from various sources. Adv Microbiol. 6: 263-275.

Monday, S.R., Bohach, G.A. (1999). Use of multiplex PCR to detect classical and newly described pyrogenic toxin genes in staphylococcal isolates. J. Clin. Microbiol. 37: 3411-3414.

Ng, L.K., Martin, I., Alfa, M., Mulvey, M. (2001). Multiplex PCR for the detection of tetracycline resistant genes. Mol. Cell Probes 15:209–215.

Okuma, K., Iwakawa, K., Turnidge, J.D., Grubb, W.B., Bell, J.M., O’Brien, F.G., *et al*. (2002). Dissemination of new methicillin-resistant *Staphylococcus aureus* clones in the community. J. Clin. Microbiol. 40:4289–4294.

Omoe, K., Dong-Liang, H., Takahashi-Omoe, H., Nakane, A., Shinagawa, K. (2005). Comprehensive analysis of classical and newly described staphylococcal super antigenic toxin genes in *Staphylococcus aureus* isolates. FEMS Microbiol. Lett. 246: 191-198.

Pereira, V., Lopes, C., Castro, A., Silva, J., Gibbs, P., Teixeira, P. (2009). Characterization for enterotoxin production, virulence factors, and antibiotic susceptibility of *Staphylococcus aureus* isolates from various foods in Portugal. Food Microbiol. 26: 278-282.

Schmitz, F.J., Fluit, A.C., Gondolf, M., Beyrau, R., Lindenlauf, E., Verhoef, J., *et al*. (1999). The prevalence of aminoglycoside resistance and corresponding resistance genes in clinical isolates of staphylococci from 19 European hospitals. J. Antimicrob Chemother. 43:253–259.

Strommenger, B., Kettlitz, C., Werner, G., Witte, W. (2003). Multiplex PCR assay for simultaneous detection of nine clinically relevant antibiotic resistance genes in *Staphylococcus aureus*. J. Clin. Microbiol. 41: 4089-4094.

Yarwood, J.M., McCormick, J.K., Paustian, M.L., Orwin, P.M., Kapur, V., Schlievert, P.M. (2002). Characterization and expression analysis of *Staphylococcus aureus* pathogenicity island 3 - Implications for the evolution of staphylococcal pathogenicity islands. J. Biol. Chem. 277:13138-13147.

Zhang, K., McClure, J.A., Elsayed, S., Louie, T., Conly, J.M. (2005). Novel multiplex PCR assay for characterization and concomitant subtyping of *Staphylococcus* cassette chromosome *mec* types I to V in methicillin-resistant *Staphylococcus aureus*. J. Clin. Microbiol. 43:5026–5033.
